# Supplementary material for: A TCR-like CAR Promotes Sensitive Antigen Recognition and Controlled T-cell Expansion Upon mRNA Vaccination
Source: PubMed Central journal article supplement (PMC10010320; doi:10.1158/2767-9764.crc-21-0154), 2022-08-18
Supplement: crc-21-0154-s01.pdf [file crc-21-0154-s01.pdf]

# 1 **Supplementary Materials and Methods**

## 2 **List of supplementary materials and methods**

3 Cytokine multiplex analysis

4 RNA-lipoplex (RNA-LPX) generation and treatment

5 Bioluminescence *in vivo* imaging

6 Co-immunoprecipitation

7 Digital droplet PCR analysis of CLDN6 expression in SK-OV-3 cells

## 9 **References**

### 11 **List of supplementary figures**

12 Fig. S1. CAR-28 $\zeta$  is more effective than TCAR prototype at inducing IFN $\gamma$  secretion and  
13 proliferation.

14 Fig. S2. Interaction between variable domains, rather than avidity, is required for TCAR3  
15 function.

16 Fig. S3. The constant domains of TCAR3 recruit endogenous CD3.

17 Fig. S4. CLDN6-TCAR surface expression in human CD8<sup>+</sup> T cells and recognition of  
18 CLDN6<sup>+</sup> target cells.

19 Fig. S5. T cells with stable TCAR expression generated by viral transduction show robust  
20 surface expression, and antigen-specific cytotoxicity.

21 Fig. S6. TCAR T cells mount potent effector functions but lack proliferation against tumor  
22 cells.

23 Fig. S7. Antigen-specific stimulation of CLDN6 and CLDN18.2-CAR T cells via CD80 and  
24 4-1BBL transfected PA-1 spheroids or DCs enhances subsequent tumor spheroid killing.

25 Fig. S8. CLDN6-TCAR and CAR-BB $\zeta$  T cells proliferate and secrete cytokines against  
26 CLDN6-LPX treated DCs.

27 Fig. S9. RNA-LPX facilitates upregulation of costimulatory molecules in splenic DCs and  
28 expands TCAR-T antigen-specifically.

29 Fig. S10. RNA-LPX mediated *in vivo* expansion of CAR-BB $\zeta$  engineered murine T cells.  
30

1

## 2 **Cytokine multiplex analysis**

3 The ProcartaPlex™ 3-Plex Kit immunoassay (Invitrogen) with multi-analyte reagent panels for  
4 quantitative analysis of human IL-2, IFN $\gamma$  and TNF $\alpha$  was used to detect cytokines after 24 h in  
5 co-cultures using Bio-Plex 2000 according to the manufacturer instructions.

## 6 **RNA-lipoplex (RNA-LPX) generation and treatment**

7 For RNA-LPX generation, 20  $\mu$ g antigen-encoding RNA was formulated into liposomes  
8 containing a DOTMA to DOPE ratio of 2 to 1 with a net charge ratio of cationic DOTMA to  
9 RNA of 1.3 to 2 [25]. For *in vitro* treatment of DCs, cells were seeded in 24 well plates, treated  
10 with the respective amounts of RNA-LPX and incubated for 24 h prior to the start of co-  
11 cultures. For *in vivo* expansion experiments 200  $\mu$ L RNA-LPX solutions buffered in 150 mM  
12 NaCl were administered into the retrobulbar venous plexus. Negative control lipoplexes were  
13 generated with irrelevant RNA mentioned in the respective figure legend. Time points of RNA-  
14 LPX treatment are indicated in the relevant graphs.

## 15 **Bioluminescence *in vivo* imaging**

16 Biodistribution and expansion of CAR-Luc-GFP transduced C57BL/6-Thy1.1<sup>+</sup> T cells was  
17 evaluated by *in vivo* bioluminescence imaging as previously described [20]. In brief, a solution  
18 of D-luciferin (80 mg/kg body weight) was administered intra-peritoneal. Radiance  
19 (photon/s/cm<sup>2</sup>) was measured 5 minutes later with an exposure time of 1 minute on an IVIS  
20 Spectrum *in vivo* Imaging System (PerkinElmer). Prior to T cell expansion, a base line value  
21 was obtained. Quantification of CAR T cell expansion are based on total flux of the indicated  
22 time point divided by total flux at baseline.

## 23 **Co-immunoprecipitation**

24 Jurkat76 cells were electroporated with antigen receptors and cultured for 20 h. Cells were  
25 pelleted and shock-frozen in liquid nitrogen and stored at -80°C. Pellets of receptor  
26 electroporated Jurkat76 cells were resuspended in lysis buffer [20 mM Tris-HCl (pH 8), 137  
27 mM NaCl, 2 mM EDTA, 10% glycerol, 0.3% Brij96V, Halt™ Protease and Phosphatase  
28 Inhibitor Cocktail (Thermo Scientific)], incubated on ice for 30 minutes (short mix every 5  
29 minutes) and centrifuged (13,000  $\times$ g, 10 minutes, 4°C) to remove cell debris. 15  $\mu$ g anti-Myc  
30 Tag antibody (Epitope Biotech Inc.) was coupled to 1.5 mg Dynabeads™ Protein G (Thermo  
31 Scientific) for 15 minutes at room temperature. The antibody-bead complex was incubated with  
32 precleared Jurkat76 cell lysates for 1 h at 4°C on a rotating mixer. Precipitated protein  
33 complexes were washed twice with PBS, 0.01% Triton X-100, [pH 7.4], Halt™ Protease and  
34 Phosphatase Inhibitor Cocktail and eluted by boiling in 4 $\times$  SDS sample buffer.  
35 Immunoprecipitated protein samples were resolved by 10% C, 3% T Tricine-SDS-PAGE [1]  
36 and analyzed by antiCD3 $\gamma$  and CD3 $\zeta$  immunoblotting (Abcam: ab134096, ab226475).  
37 Visualization was done with a CCD camera (ImageQuant LAS4000; GE Healthcare Life  
38 Sciences).

## 39 **Digital droplet PCR analysis of CLDN6 expression in SK-OV-3 cells**

40 Total RNA was extracted from SK-OV-3 and Colo-699-N cell lines using RNeasy Mini Kit  
41 (QIAGEN). From fresh frozen placenta TRIzol/chloroform based RNA extraction was  
42 performed followed by RNA clean-up using RNeasy Mini Kit (QIAGEN). 1  $\mu$ g of each  
43 samples' total RNA was subsequently reverse transcribed using PrimeScript™ RT Reagent Kit  
44 with gDNA Eraser (Takara Bio Inc.). To generate a no amplification control (no amplification  
45 ctrl.), 1  $\mu$ g SK-OV-3 RNA was used without addition of reverse transcriptase enzyme, replacing  
46 the enzyme's volume in the reaction with PCR-grade, RNase-free water. Expression of CLDN6  
47 was determined via Droplet Digital™ PCR (ddPCR™) on a Bio-Rad QX200™ System. The  
48 ddPCR™ was performed with QX200™ ddPCR™ EvaGreen Supermix (BioRad) using the

1 following primers with a final concentration of 90 nM each in the reaction: *CLDN6* (forward  
2 5'-CTT ATC TCC TTC GCA GTG CAG-3'; reverse 5'-AAG GAG GGC GAT GAC ACA  
3 GAG-3') *HPRT1* (forward 5'-TGA CAC TGG CAA AAC AAT GCA-3'; reverse 5'-GGT CCT  
4 TTT CAC CAG CAA GCT-3') [2]. The following thermal protocol was used in the PCR: Hot  
5 Start for 5 min at 95°C, 40 cycles of two-step PCR using a denaturation temperature of 95°C  
6 for 30 seconds and 62°C for 1 minutes for annealing/elongation. The last cycle was followed  
7 by a signal-stabilizing step (recommended by the manufacturer) with an incubation for 5 min  
8 at 4°C following 5 min at 95°C, finally the reaction was held at 12°C until the sample was  
9 transferred to the QX200™ Droplet Reader. All steps used a ramping rate of 2°C/sec. For each  
10 assay the positive threshold was defined individually, the total numbers of positive droplets  
11 were counted and *CLDN6* expression was normalized to reference gene *HPRT1*. Negative  
12 controls, no template control (no template ctrl.), no amplification control. Positive control,  
13 placenta sample.  
14  
15  
16  
17  
18

## 19 **References**

- 20 [1] Schägger H, Jagow G von. Tricine-sodium dodecyl sulfate-polyacrylamide gel  
21 electrophoresis for the separation of proteins in the range from 1 to 100 kDa. *Analytical*  
22 *Biochemistry* 1987;166:368–79.
- 23 [2] Stadler CR, Bähr-Mahmud H, Celik L, Hebich B, Roth AS, Roth RP, et al. Elimination  
24 of large tumors in mice by mRNA-encoded bispecific antibodies. *Nature medicine*  
25 2017;23:815–17.

26  
27

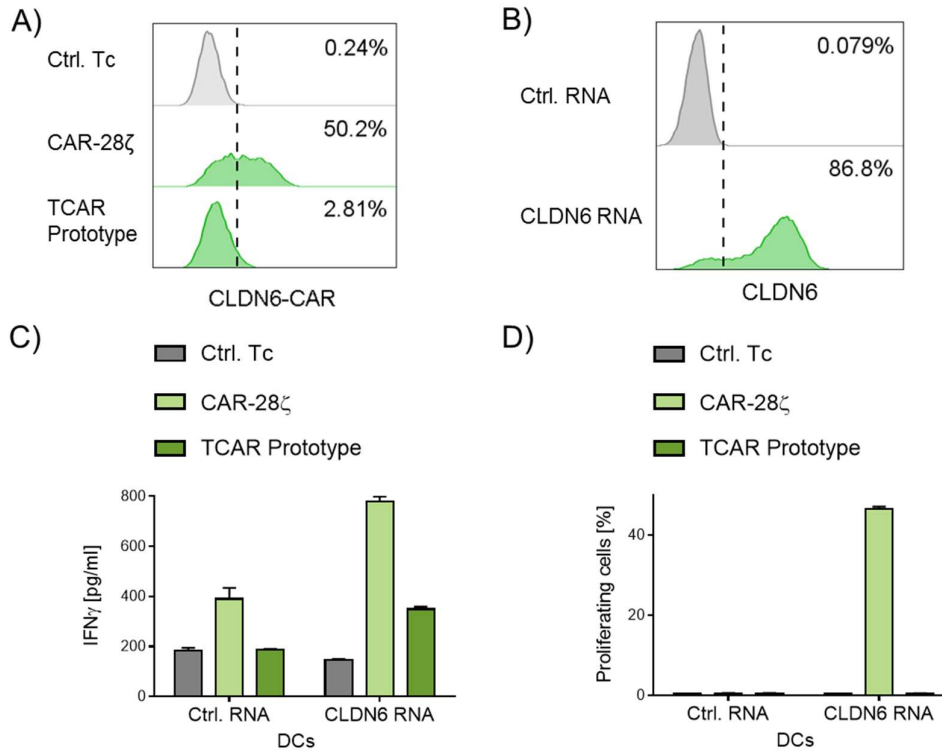

1  
2 **Fig. S1. CAR-28 $\zeta$  is more effective than TCAR prototype at inducing IFN $\gamma$  secretion and**  
3 **proliferation. (A)** CAR surface expression on human CD8<sup>+</sup> T cells analyzed by flow  
4 cytometry. **(B)** CLDN6 surface expression on CLDN6<sup>+</sup> DCs analyzed by flow cytometry. **(C)**  
5 IFN $\gamma$  concentrations in culture supernatants of co-cultures of CLDN6-CAR T cells with  
6 CLDN6-electroporated DCs (E:T ratio of 1:1). **(D)** Proliferation of receptor-transfected human  
7 CD8<sup>+</sup> T cells after coculture with antigen-transfected DCs (E:T = 6:1) analyzed by CFSE  
8 proliferation assay. T cells expressing TCAR prototype  $\beta$ -chain alone (Ctrl. Tc), and DCs  
9 expressing gp100 RNA (Ctrl. RNA) were used as controls. Graphs show mean + SD of  
10 technical duplicates.

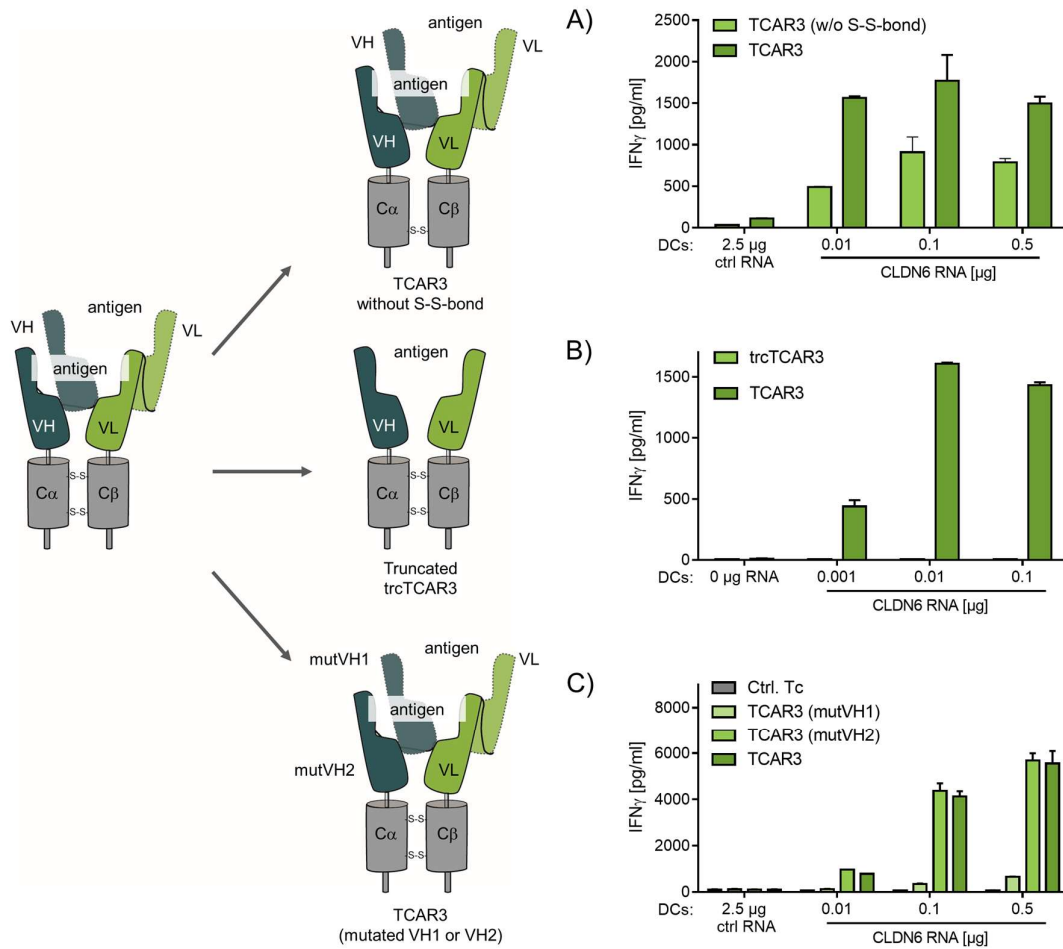

1  
 2 **Fig. S2. Interaction between variable domains, rather than avidity, is required for TCAR3**  
 3 **function.** Sequence variants of CLDN6-specific TCAR3 were tested for their impact on IFN $\gamma$   
 4 secretion of human CD8 $^+$  T cells upon antigen-specific stimulation with CLDN6 $^+$  DCs. The  
 5 three sequence variants are shown on the left. (A) Back-mutation of an artificial di-sulfide bond  
 6 between the human constant domains of TCAR3. (B) Truncation (trc) of TCAR3 (with human  
 7 constant domains) to only one pair of variable domains, and (C) Point mutations in the distal  
 8 VH1 (mutVH1) or proximal VH2 (mutVH2) domains of TCAR3 with murine C-domains. DCs  
 9 transfected with a control RNA (gp100 RNA (A), CLDN18.2 RNA (C)) or water (B), and T  
 10 cells transfected with TCAR prototype  $\alpha$ -chain alone (Ctrl. Tc) were used as negative controls.  
 11 Graphs show mean + SD of technical duplicates.

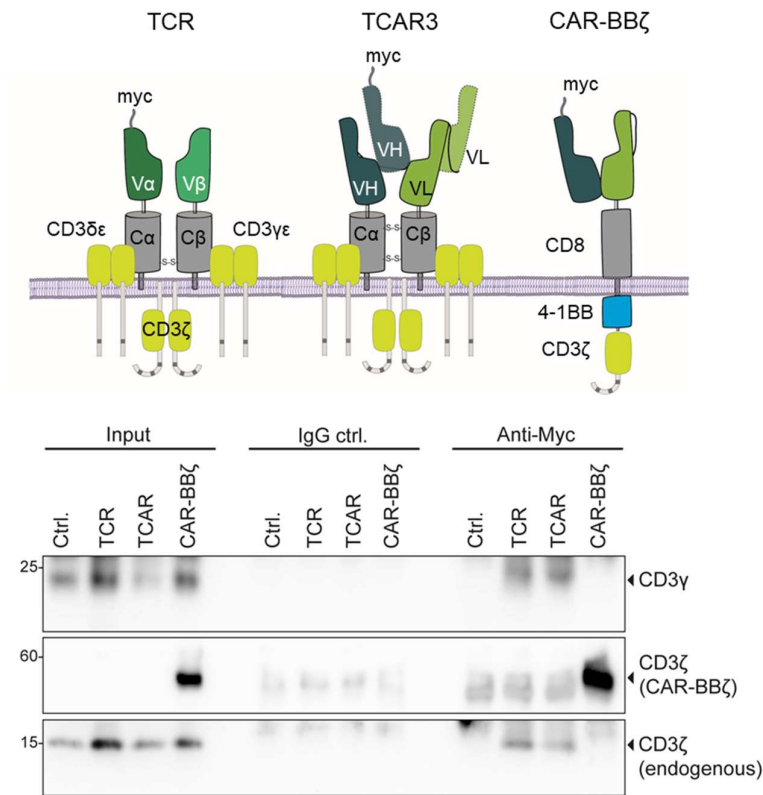

1  
 2 **Fig. S3. The constant domains of TCAR3 recruit endogenous CD3.** Co-  
 3 immunoprecipitation of CD3 subunits with Myc-tagged mouse TCR, CAR-BBζ, or TCAR3  
 4 with mouse C-domains. Input: Cell lysates of receptor-transfected Jurkat76 cells. IgG ctrl.:  
 5 pulldown control using mouse IgG isotype antibody. Anti-Myc: pulldown using anti-Myc  
 6 antibody. Western blot shows antibody staining for co-precipitated CD3ζ and CD3γ chains.  
 7 Jurkat76 transfected with  $C\alpha$  alone were used as a negative control (Ctrl.).

8

1

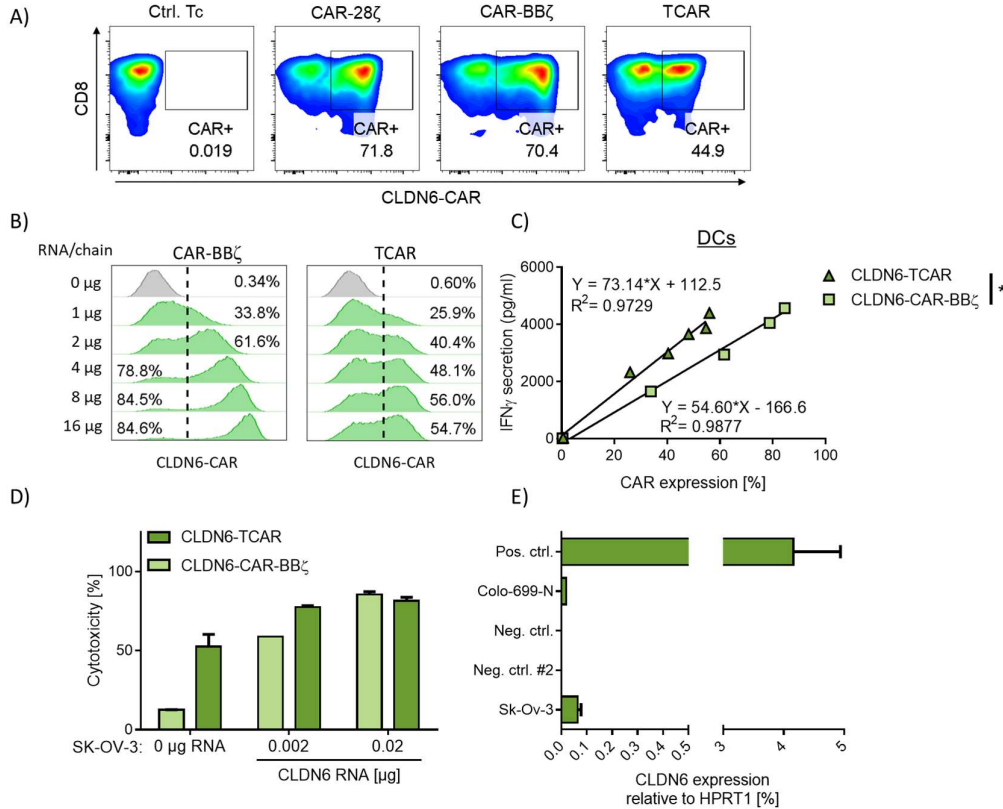

2

3

4

5

6

7

8

9

10

11

12

13

14

15

16

17

**Fig. S4. CLDN6-TCAR surface expression in human CD8<sup>+</sup> T cells and recognition of CLDN6<sup>+</sup> target cells.** (A, B) Receptor surface expression on human CD8<sup>+</sup> T cells transfected with receptor-encoding RNA analyzed by flow cytometry. Equimolar (30 pmol, with 20 μg CAR-28ζ, 15 μg CAR-BBζ and 12 μg TCAR) (A) and escalated (B) RNA amounts used per receptor-chain. Controls, Cα-transfected T cells (Ctrl.Tc). Mean + SD. (C) Correlation of receptor surface expression and cognate IFNγ secretion of receptor-transfected CD8<sup>+</sup> T cells in culture supernatants after co-culture with human CLDN6 RNA-transfected DCs (1 μg) for 20 h (E:T = 2:1). Unpaired *t*-test used to compare for statistical significance between slope of linear regressions in B. \**p* < 0.05. (D) Cytotoxicity of RNA-transfected T cells with equal CAR-T frequency (4 μg TCAR RNA and 1.75 μg CAR-BBζ RNA) against human SK-OV-3 tumor cells transfected with CLDN6 RNA or water (0 μg RNA) in xCELLigence-based cytotoxicity assay. (E) Expression level of CLDN6 in different cell types relative to HPRT by droplet digital PCR. Controls, no template control (Neg. ctrl.), no amplification control (Neg. ctrl. #2), placenta sample (pos. ctrl.).

17

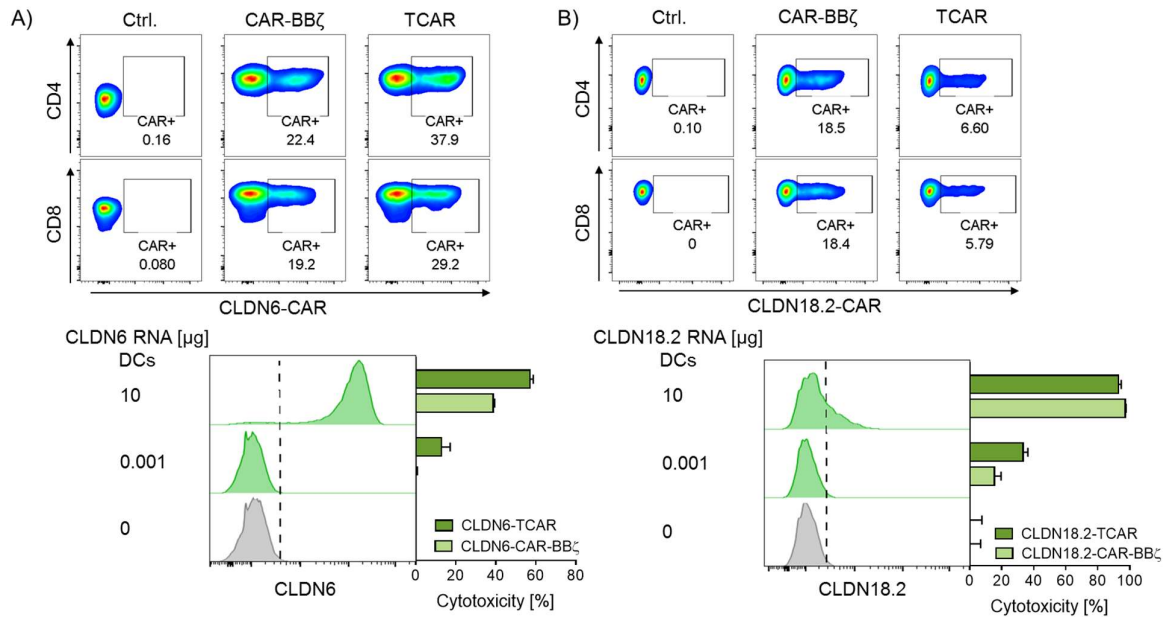

1  
2  
3  
4  
5  
6  
7  
8  
9  
10  
11

**Fig. S5. T cells with stable TCAR expression generated by viral transduction show robust surface expression, and antigen-specific cytotoxicity.** Characterization of CLDN6- (A) and CLDN18.2-TCAR (B) transduced CD3<sup>+</sup> human T cells, in comparison to CLDN6- and CLDN18.2-CAR-BBζ and negative controls. Controls, TCAR stained with isotype control antibody for CLDN6-CAR (Ctrl. in A) or non-transduced T cells stained with anti-CAR antibody (Ctrl. in B). (Top row) CLDN6- or CLDN18.2-CAR staining on receptor-expressing T cells, analyzed by flow cytometry. (Bottom row) Analysis of T cell-mediated recognition and cytotoxicity against CLDN6<sup>+</sup> or CLDN18.2<sup>+</sup> DCs after 24 h (E:T of 6:1). CAR-T frequencies were not adjusted for this assay. Graphs show mean + SD of technical triplicates.



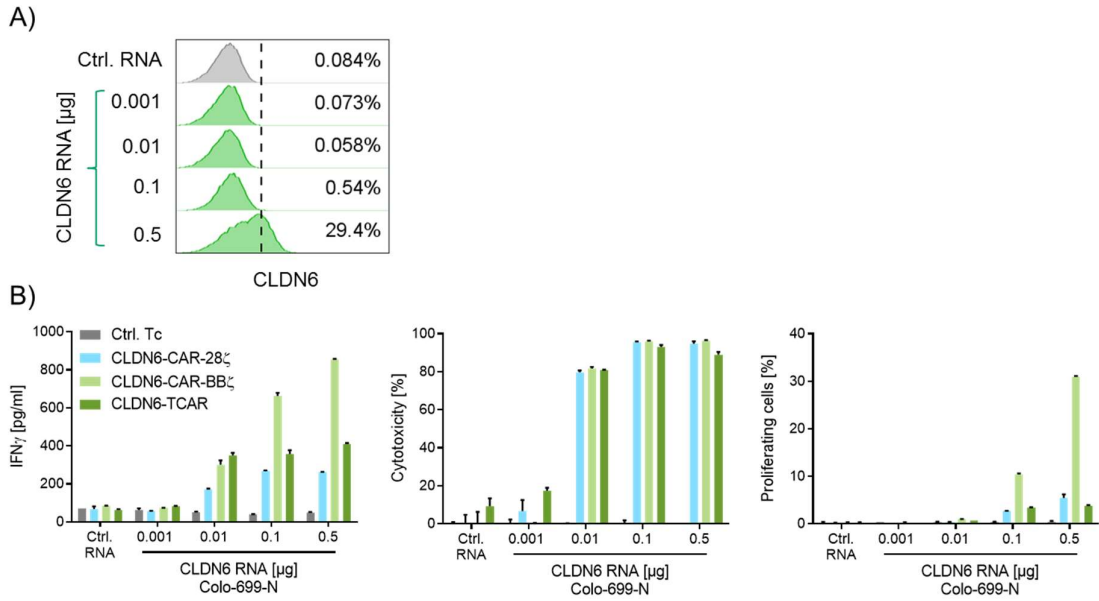

1  
2 **Fig. S6. TCAR T cells mount potent effector functions but lack proliferation against**  
3 **tumor cells. (A)** CLDN6 surface expression on CLDN6 RNA-transfected human Colo-699-N  
4 cells analyzed with flow cytometry. Colo-699-N cells transfected with 2.5 µg CLDN18.2 RNA  
5 (Ctrl. RNA) were used as a negative control. **(B)** IFN $\gamma$  secretion (left), cytotoxicity (middle)  
6 and proliferation (right) of equimolar receptor RNA-transfected human CD8<sup>+</sup> T cells co-  
7 cultured (expression data in Fig. S4A) with CLDN6-transfected Colo-699-N (E:T ratio = 10:1  
8 or 20:1 (right)). IFN $\gamma$  was analyzed by IFN $\gamma$  ELISA, cytotoxicity was assessed using a  
9 luciferase-based cytotoxicity assay, and proliferation was assessed using a CFSE-mediated  
10 proliferation assay. T cells transfected with  $\alpha$  RNA only (ctrl. Tc), and Colo-699-N cells  
11 transfected with CLDN18.2 RNA (Ctrl. RNA) were used as negative controls. Graphs show  
12 mean + SD of technical duplicates (left, right) or triplicates (middle) representative for 3 blood  
13 donors.

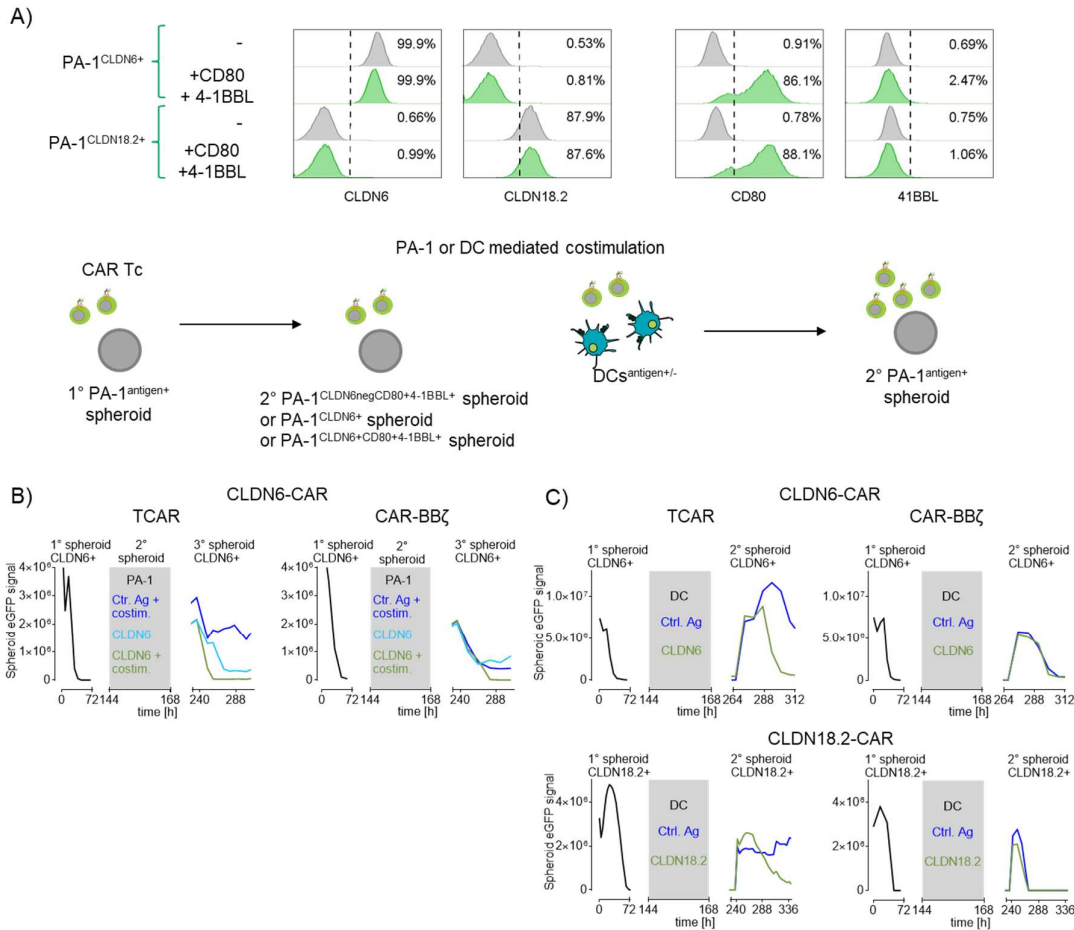

1  
2 **Fig. S7. Antigen-specific stimulation of CLDN6 and CLDN18.2-CAR T cells via CD80 and**  
3 **4-1BBL transfected PA-1 spheroids or DCs enhances subsequent tumor spheroid killing.**  
4 Serial killing of human eGFP<sup>+</sup> CLDN<sup>+</sup> PA-1 spheroids by human receptor-transduced T cells  
5 monitored by *in vitro* live cell imaging of eGFP<sup>+</sup> tumor cells. **(A)** CLDN6, CLDN18.2, CD80  
6 and CD137L staining on transfected PA-1 tumor cells. **(B)** Repetitive tumor spheroid assay  
7 with tumor cell-mediated costimulation phase (grey inlay). CLDN6-specific CAR T cells were  
8 co-cultured with: (1°) PA-1<sup>CLDN6+</sup> spheroids (E:T 30:1); (2°, grey inlay) PA-1<sup>CLDN6+</sup> spheroids  
9 transfected with costimulatory molecules CD80 and 4-1BBL; (3°) PA-1<sup>CLDN6+</sup> spheroids. PA-  
10 1<sup>CLDN18.2+</sup>CD80+4-1BBL<sup>+</sup> served as negative control (Ctrl. Ag<sup>costim+</sup>). **(C)** Repetitive tumor spheroid  
11 assay with DC-mediated costimulation phase (grey inlay). CLDN6- (upper panel) or  
12 CLDN18.2-specific (lower panel) CAR T cells co-cultured with: (1°) PA-1<sup>CLDN6+</sup> or PA-  
13 1<sup>CLDN18.2+</sup> tumor spheroids (E:T 30:1 or 10:1, respectively); (grey inlay) CLDN<sup>+</sup> DCs for 5 days;  
14 (2°) PA-1<sup>CLDN6+</sup> and PA-1<sup>CLDN18.2+</sup> tumor spheroids. Controls, CLDN18.2<sup>+</sup> DCs served as  
15 negative controls for CLDN6-CAR (Ctrl. Ag) and vice versa. Graphs show mean CAR T cell  
16 killing kinetics of three (A, B, upper panel) or four (B, lower panel) technical replicates.

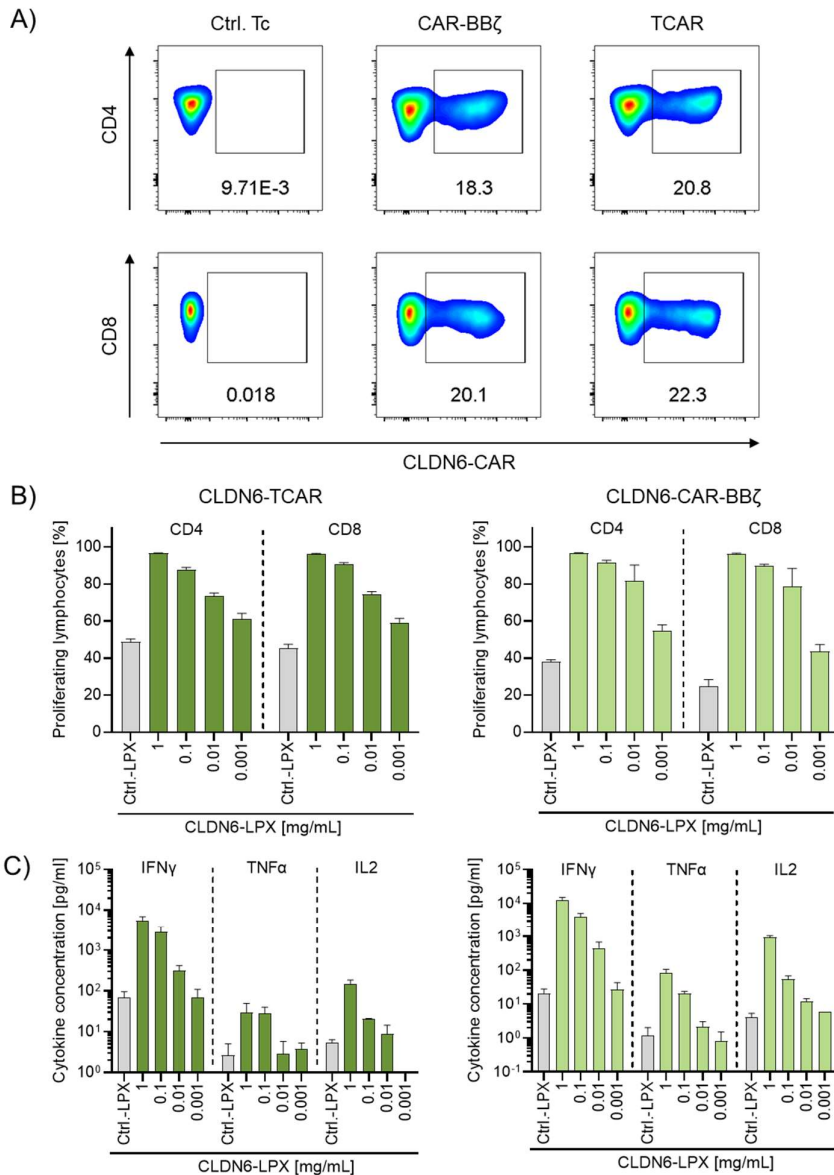

1

2 **Fig. S8. CLDN6-TCAR and CAR-BBζ T cells proliferate and secrete cytokines against**  
 3 **CLDN6-LPX treated DCs. (A)** Expression of CLDN6-TCAR/CAR on T cells after retroviral  
 4 transduction. **(B)** Proliferation and **(C)** cytokine secretion of human CLDN6-TCAR (left) or  
 5 CLDN6-CAR-BBζ (right) transduced T cells after co-culture with RNA-LPX treated DCs (E:T  
 6 10:1). Proliferation of CFSE labeled T cells was assessed using flow cytometry. Cytokine  
 7 secretion was analyzed via a multiplex assay. DCs treated with 1 mg/mL eGFP RNA-LPX  
 8 served as negative control (Ctrl.-LPX). Graphs show mean + SD of technical triplicates.

9

1

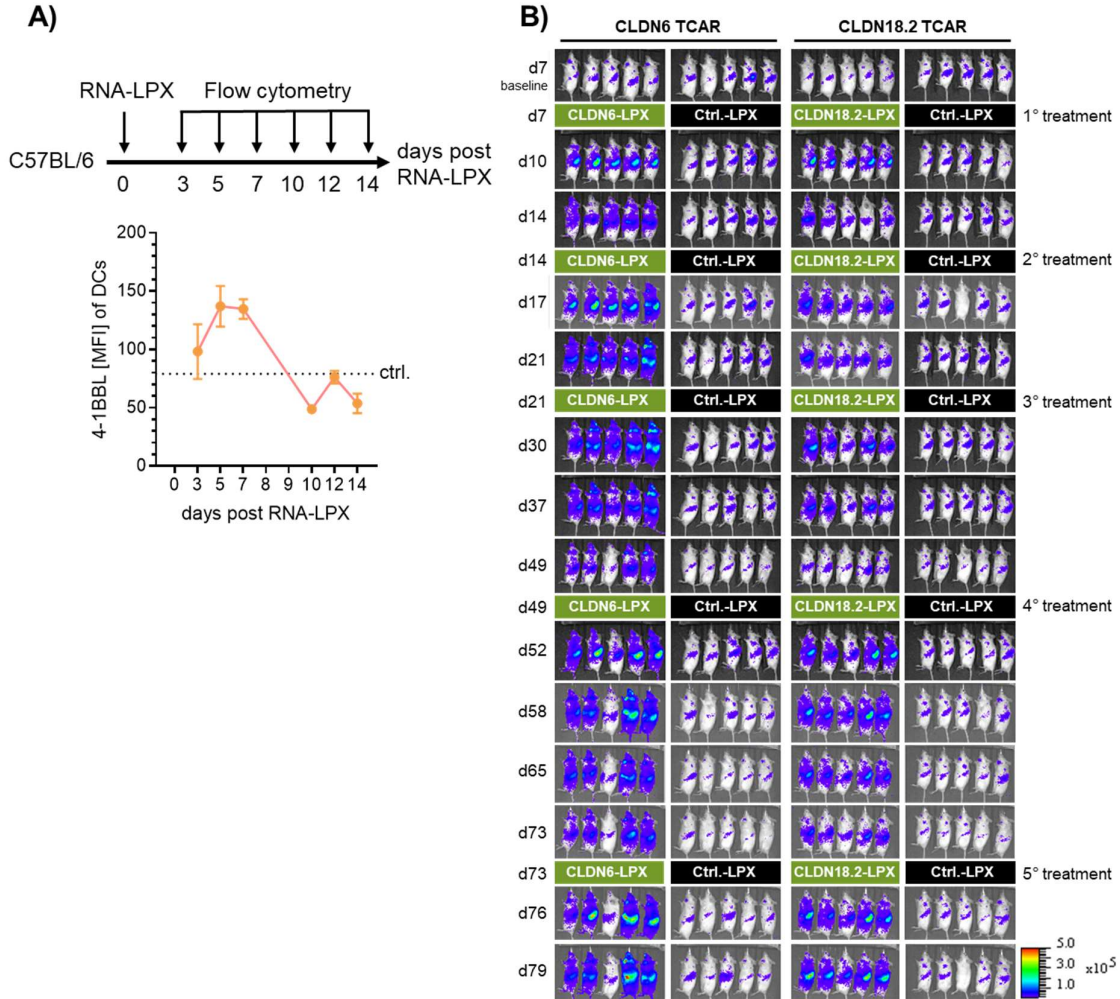

2

3 **Fig. S9. RNA-LPX facilitates upregulation of costimulatory molecules in splenic DCs and**  
 4 **expands TCAR-T antigen-specifically. (A)** 4-1BBL expression kinetics on splenic DCs after  
 5 RNA-LPX treatment (20  $\mu$ g OVA<sub>257-264</sub>) detected as mean fluorescence intensity (MFI) via  
 6 flow cytometry. Sodium chloride was administered as treatment control (ctrl.). **(B)** Luc-GFP-  
 7 expressing Thy1.1<sup>+</sup> CLDN6- or CLDN18.2-TCAR mouse T cells were transferred into total  
 8 body irradiated (TBI) Thy1.2<sup>+</sup> C57BL/6-albino mice (n = 5 mice/group). Mice were treated  
 9 with 20  $\mu$ g of CLDN6 or CLDN18.2 encoding RNA formulated into lipoplexes.  
 10 Bioluminescence imaging of mice was monitored over 79 days. CLDN18.2-LPX served as  
 11 negative control (Ctrl. LPX) for CLDN6-CARs, and CLDN6-LPX as a negative control for  
 12 CLDN18.2-CARs. Images correspond to data presented in Fig. 2C.

13

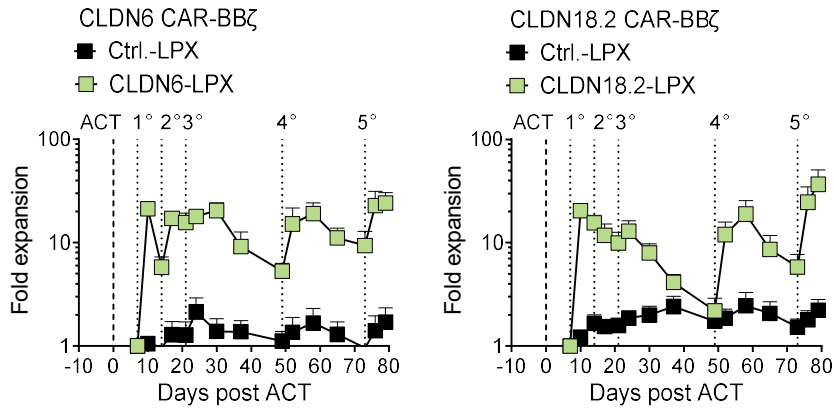

1

2 **Fig. S10. RNA-LPX mediated *in vivo* expansion of CAR-BBζ engineered murine T cells.**  
 3 RNA-LPX vaccination mediates CAR-BBζ T cell expansion in a syngeneic *in vivo* mouse  
 4 model. Luc-GFP-expressing Thy1.1<sup>+</sup> CLDN6- or CLDN18.2-CAR-BBζ mouse T cells were  
 5 transferred into total body irradiated (TBI) Thy1.2<sup>+</sup> C57BL/6-albino mice (n = 5 mice/group).  
 6 Seven days later mice were injected with 20 μg CLDN6 or CLDN18.2 RNA-LPX. Kinetics of  
 7 CAR-BBζ T cell expansion by bioluminescence imaging (BLI, upper panel) are shown.  
 8 CLDN18.2-LPX served as negative control (Ctrl. LPX) for CLDN6-CARs, and CLDN6-LPX  
 9 as a negative control for CLDN18.2-CARs. Mean + SEM of 5 mice per group is shown.
